# Supplementary material
Source: PubMed Central journal article supplement (PMC7219473)
Supplement: NIHMS1559810-supplement-Supplemental_Material_1.pdf [file NIHMS1559810-supplement-Supplemental_Material_1.pdf]

Table 1

*Intervention Content*

| Week             | Topic                                    | Behavioral skills                                                                                                                                                                                                  | Education Points                                                                                                                                                                                                                                                                                                           |
|------------------|------------------------------------------|--------------------------------------------------------------------------------------------------------------------------------------------------------------------------------------------------------------------|----------------------------------------------------------------------------------------------------------------------------------------------------------------------------------------------------------------------------------------------------------------------------------------------------------------------------|
| 1                | Meal timing and hydration                | <ul style="list-style-type: none"> <li>• Education</li> <li>• SMART (specific, measurable, attainable, relevant, and time-bound) goal</li> <li>• Action plan</li> <li>• Monitoring method and frequency</li> </ul> | <ul style="list-style-type: none"> <li>•Space liquids and solids by 20-30 minutes</li> <li>•Eat several small meals throughout the day</li> <li>•Avoid skipping meals</li> <li>•Drink 64 oz. of water daily</li> <li>•Eliminate carbonated and sugar sweetened beverages</li> <li>•Minimize alcohol consumption</li> </ul> |
| 2                | Protein and carbohydrate intake          |                                                                                                                                                                                                                    | <ul style="list-style-type: none"> <li>•Consume 60-80 g protein daily</li> <li>•Focus on carbohydrates from vegetables, whole grains, and occasional fruits</li> <li>•Avoid highly processed carbohydrates (e.g., candy, desserts, etc.)</li> </ul>                                                                        |
| 3                | Exercise and lifestyle physical activity |                                                                                                                                                                                                                    | <ul style="list-style-type: none"> <li>• Engage in regular exercise</li> <li>• Increase lifestyle physical activity</li> <li>• Listen to body; do not push too much, too soon</li> </ul>                                                                                                                                   |
| 4                | Vitamin and mineral supplementation      |                                                                                                                                                                                                                    | <ul style="list-style-type: none"> <li>•Labs with bariatric team are important for determining proper supplementation</li> <li>•If taking iron and calcium, take them at least 2 hours apart</li> </ul>                                                                                                                    |
| 6, 8, 10, 12, 14 | Maintenance of weight loss               |                                                                                                                                                                                                                    | <ul style="list-style-type: none"> <li>• Satisfaction with outcomes</li> <li>• Self-weighing</li> <li>• Relapse prevention</li> <li>• Social support</li> </ul>                                                                                                                                                            |
